# Supplementary material for: Fe–Cu cooperative catalysis in the isomerization of alkyl Grignard reagents
Source: Royal Society of Chemistry journal article supplement (doi:10.1039/b717717h), 2008-01-01
Supplement: b717717h.pdf [file b717717h.pdf]

**Supporting information for**  
**“A Fe–Cu cooperative catalysis in isomerization of alkyl Grignard reagents”**  
Eiji Shirakawa,\* Daiji Ikeda, Shigeru Yamaguchi and Tamio Hayashi\*

**General remarks.** All manipulations of oxygen- and moisture-sensitive materials were conducted with a standard Schlenk technique under a nitrogen atmosphere. Nuclear magnetic resonance spectra were taken on a JEOL JNM FX400 spectrometer ( $^1\text{H}$ , 400 MHz) or a JEOL JNM LA500 spectrometer ( $^1\text{H}$ , 500 MHz;  $^{13}\text{C}$ , 125 MHz) using tetramethylsilane as an internal standard. GC spectra were taken on Shimadzu GC18A. High-resolution mass spectra were obtained with a Bruker Daltonics microTOF-Q spectrometer (ESI) or a JEOL JMS-700 spectrometer (EI). Unless otherwise noted, reagents were commercially available and used without further purification. Tetrahydrofuran and diethyl ether were purified by passing through an alumina/catalyst column system (GlassContour Co.). Alkylmagnesium halides were prepared in THF or  $\text{Et}_2\text{O}$  by the reaction of the corresponding alkyl halides with magnesium turning.

**Isomerization of alkyl Grignard reagents followed by the reaction with chloro(phenyl)silane. A general procedure.** A solution of  $\text{FeCl}_3$  (1.2 mg, 0.0074 mmol for Table 1; 3.2 mg, 0.020 mmol for Scheme 7) and/or  $\text{CuBr}$  (2.2 mg, 0.015 mmol for Table 1; 5.7 mg, 0.040 mmol for Scheme 7) in addition to  $\text{PBU}_3$  (7.5  $\mu\text{L}$ , 6.1 mg, 0.030 mmol for Table 1; 20.0  $\mu\text{L}$ , 16.2 mg, 0.0801 mmol for Scheme 7) in THF (2.0 mL) was placed in a 20 mL Schlenk tube and stirred for 5 min at  $-25\text{ }^\circ\text{C}$ . To this solution was added a THF or  $\text{Et}_2\text{O}$  solution (0.18–0.80 M) of an alkylmagnesium halide (0.30 mmol for Table 1; 0.40 mmol for Scheme 7), and the mixture was stirred at the temperature specified in Table 1 or Scheme 7. After the time specified in Table 1 or Scheme 7, chloro(phenyl)silane (80  $\mu\text{L}$ , 86 mg, 0.60 mmol for Table 1; 107  $\mu\text{L}$ , 114 mg, 0.800 mmol for Scheme 7) was added, and stirred at  $30\text{ }^\circ\text{C}$  (Table 1) or  $60\text{ }^\circ\text{C}$  (Scheme 7) for 2 h. To this solution were added water (1 mL) and nonane (internal standard for GC analysis), and the resulting mixture was diluted with diethyl ether (2 mL). An aliquot of the organic layer was subjected to GC analysis. The yields and the isomer ratios were determined by GC using nonane as an internal standard. As for entry 1 of Table 1 and Scheme 7, the alkylsilanes were isolated as follows. After extraction with diethyl ether (5 mL x 3) from the reaction mixture above, the combined organic layer was washed with brine (10 mL) and dried over anhydrous magnesium sulfate. Evaporation of the solvent followed by purification with PTLC ( $\text{SiO}_2$ : hexane) gave 1-hexyl(phenyl)silane (**4**: 47 mg, 81%) or phenyl(1-phenylethyl)silane (**23**: 59 mg, 69%).

**A representative procedure for preparation of the authentic samples of alkyl(phenyl)silanes: 3-hexyl(phenyl)silane (15).** To an  $\text{Et}_2\text{O}$  solution (0.37 M) of 3-hexylmagnesium bromide (**14**: 1.35 mL, 0.50 mmol) in THF (3.0 mL) was added chloro(phenyl)silane (133  $\mu\text{L}$ , 142 mg, 1.00 mmol), and the mixture was stirred at  $30\text{ }^\circ\text{C}$  for 2 h. To this solution was added water (1 mL), and the resulting mixture was extracted with diethyl ether (4 mL x 2). The combined organic layer was washed with brine (5 mL) and dried over anhydrous magnesium sulfate. Evaporation of the solvent followed by purification with PTLC ( $\text{SiO}_2$ : hexane) gave 3-hexyl(phenyl)silane (**15**: 87 mg, 91%) as a colorless oil.  $^1\text{H}$  NMR (500 MHz,  $\text{CDCl}_3$ )  $\delta$  0.87 (t,  $J = 7.2$  Hz, 3 H), 0.95 (t,  $J = 7.5$  Hz, 3 H), 1.02–1.09 (m, 1 H), 1.34–1.41 (m, 2 H), 1.43 (quint,  $J = 6.9$  Hz, 2 H), 1.47–1.56 (m, 2 H), 4.25 (d,  $J = 2.9$  Hz,  $^1J_{\text{Si-H}} = 191$  Hz, 2 H), 7.32–7.41 (m, 3 H), 7.55–7.59 (m, 2 H).  $^{13}\text{C}$  NMR (125 MHz,  $\text{CDCl}_3$ )  $\delta$  13.2, 14.3, 21.8, 23.9, 24.1, 33.1, 127.9, 129.4, 132.6, 135.6. HRMS (EI) Calcd for  $\text{C}_{12}\text{H}_{20}\text{Si}$ :  $\text{M}^+$ , 192.1334. Found:  $m/z$  192.1330.

Other alkylsilanes **4**, **3**, **16**, phenyl(2-phenylethyl)silane and **23** have already been reported in the

literature. Their  $^1\text{H}$  NMR data are as follows.

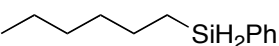 **1-Hexyl(phenyl)silane (4).**<sup>[1]</sup> 94% yield (reaction temperature = 30 °C). A colorless oil.  $^1\text{H}$  NMR (500 MHz,  $\text{C}_6\text{D}_6$ )  $\delta$  0.79–0.84 (m, 2 H), 0.86 (t,  $J = 7.2$  Hz, 3 H), 1.12–1.30 (m, 6 H), 1.34–1.44 (m, 2 H), 4.51 (t,  $J = 3.7$  Hz,  $^1J_{^{29}\text{Si-H}} = 191$  Hz, 2 H), 7.13–7.19 (m, 3 H), 7.49–7.55 (m, 2 H).  $^1\text{H}$  NMR (500 MHz,  $\text{CDCl}_3$ )  $\delta$  0.87 (t,  $J = 7.0$  Hz, 3 H), 0.91–0.97 (m, 2 H), 1.21–1.32 (m, 4 H), 1.35 (quint,  $J = 6.9$  Hz, 2 H), 1.41–1.49 (m, 2 H), 4.28 (t,  $J = 3.7$  Hz,  $^1J_{^{29}\text{Si-H}} = 192$  Hz, 2 H), 7.32–7.42 (m, 3 H), 7.54–7.59 (m, 2 H).

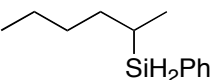 **2-Hexyl(phenyl)silane (3).**<sup>[1]</sup> 94% yield (reaction temperature = 30 °C). A colorless oil.  $^1\text{H}$  NMR (500 MHz,  $\text{C}_6\text{D}_6$ )  $\delta$  0.84 (t,  $J = 7.2$  Hz, 3 H), 1.02–1.07 (m, 4 H), 1.12–1.41 (m, 5 H), 1.46–1.56 (m, 1 H), 4.42–4.45 (m, 1 H), 4.46–4.49 (m, 1 H), 7.12–7.18 (m, 3 H), 7.51–7.56 (m, 2 H).  $^1\text{H}$  NMR (500 MHz,  $\text{CDCl}_3$ )  $\delta$  0.87 (t,  $J = 7.2$  Hz, 3 H), 1.06 (d,  $J = 7.1$  Hz, 3 H), 1.09–1.20 (m, 1 H), 1.21–1.56 (m, 6 H), 4.19 (dd,  $J = 6.0, 3.3$  Hz,  $^1J_{^{29}\text{Si-H}} = 191$  Hz, 1 H), 4.23 (dd,  $J = 6.0, 2.6$  Hz,  $^1J_{^{29}\text{Si-H}} = 191$  Hz, 1 H), 7.32–7.42 (m, 3 H), 7.54–7.59 (m, 2 H).

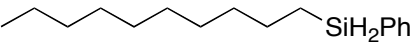 **1-Decyl(phenyl)silane (16).**<sup>[2]</sup> 98% yield (reaction temperature = 30 °C). A colorless oil.  $^1\text{H}$  NMR (500 MHz,  $\text{CDCl}_3$ )  $\delta$  0.88 (t,  $J = 7.0$  Hz, 3 H), 0.90–0.97 (m, 2 H), 1.20–1.38 (m, 14 H), 1.41–1.49 (m, 2 H), 4.28 (t,  $J = 3.7$  Hz,  $^1J_{^{29}\text{Si-H}} = 192$  Hz, 2 H), 7.32–7.42 (m, 3 H), 7.54–7.59 (m, 2 H).

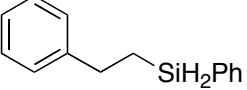 **Phenyl(2-phenylethyl)silane.**<sup>[1]</sup> 97% yield (reaction temperature = 60 °C). A colorless oil.  $^1\text{H}$  NMR (500 MHz,  $\text{C}_6\text{D}_6$ )  $\delta$  1.10 (tt,  $J = 8.4, 3.6$  Hz, 2 H), 2.61 (t,  $J = 8.4$  Hz, 2 H), 4.45 (t,  $J = 3.6$  Hz,  $^1J_{^{29}\text{Si-H}} = 193$  Hz, 2 H), 7.00 (d,  $J = 7.6$  Hz, 2 H), 7.06 (t,  $J = 7.4$  Hz, 1 H), 7.12–7.19 (m, 5 H), 7.42–7.47 (m, 2 H).  $^1\text{H}$  NMR (500 MHz,  $\text{CDCl}_3$ )  $\delta$  1.30 (tt,  $J = 8.4, 3.7$  Hz, 2 H), 2.77 (t,  $J = 8.4$  Hz, 2 H), 4.32 (t,  $J = 3.7$  Hz,  $^1J_{^{29}\text{Si-H}} = 194$  Hz, 2 H), 7.13–7.23 (m, 3 H), 7.27 (t,  $J = 7.6$  Hz, 2 H), 7.32–7.44 (m, 3 H), 7.56 (d,  $J = 7.7$  Hz, 2 H).

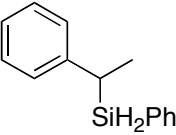 **Phenyl(1-phenylethyl)silane (23).**<sup>[1]</sup> 92% yield (reaction temperature = 60 °C). A colorless oil.  $^1\text{H}$  NMR (500 MHz,  $\text{C}_6\text{D}_6$ )  $\delta$  1.33 (d,  $J = 7.6$  Hz, 3 H), 2.41 (qt,  $J = 7.6, 3.3$  Hz, 1 H), 4.47 (dd,  $J = 6.8, 3.3$  Hz,  $^1J_{^{29}\text{Si-H}} = 196$  Hz, 1 H), 4.49 (dd,  $J = 6.8, 3.3$  Hz,  $^1J_{^{29}\text{Si-H}} = 196$  Hz, 1 H), 6.98–7.04 (m, 3 H), 7.05–7.16 (m, 5 H), 7.30–7.36 (m, 2 H).  $^1\text{H}$  NMR (500 MHz,  $\text{CDCl}_3$ )  $\delta$  1.45 (d,  $J = 7.5$  Hz, 3 H), 2.62 (qt,  $J = 7.5, 3.4$  Hz, 1 H), 4.31 (dd,  $J = 6.8, 3.4$  Hz,  $^1J_{^{29}\text{Si-H}} = 197$  Hz, 1 H), 4.33 (dd,  $J = 6.8, 3.4$  Hz,  $^1J_{^{29}\text{Si-H}} = 197$  Hz, 1 H), 7.06–7.14 (m, 3 H), 7.24 (t,  $J = 7.7$  Hz, 2 H), 7.30 (t,  $J = 7.6$  Hz, 2 H), 7.35–7.42 (m, 3 H).

**Iron-copper-catalyzed isomerization of 2-hexylmagnesium bromide followed by reaction with benzaldehyde (Scheme 1).** A solution of  $\text{FeCl}_3$  (2.8 mg, 18  $\mu\text{mol}$ ),  $\text{CuBr}$  (5.0 mg, 35  $\mu\text{mol}$ ) and  $\text{PBU}_3$  (17  $\mu\text{L}$ , 14 mg, 70  $\mu\text{mol}$ ) in THF (2.0 mL) was placed in a 20 mL Schlenk tube and stirred for 5 min at  $-25$  °C. To this solution was added an  $\text{Et}_2\text{O}$  solution (0.58 M) of 2-hexylmagnesium bromide (**1a**: 1.2 mL, 0.70 mmol), and the mixture was stirred for 10 min at  $-25$  °C. Benzaldehyde (50 mg, 0.47 mmol) was added at  $-25$  °C, and the stirring was continued for another 10 min. After a 10%  $\text{NH}_4\text{Cl}$  aqueous solution (10 mL) was added, the resulting mixture was extracted with diethyl ether (10 mL x 3). The combined organic layer was washed with brine (10 mL) and dried over anhydrous magnesium sulfate. Evaporation of the solvent followed by purification with PTLC ( $\text{SiO}_2$ : hexane/ethyl acetate = 4/1) gave 1-phenyl-1-

heptanol<sup>[3]</sup> (**5**: 75 mg, 83%) as a colorless oil. <sup>1</sup>H NMR (500 MHz, CDCl<sub>3</sub>) δ 0.87 (t, *J* = 6.9 Hz, 3 H), 1.20–1.35 (m, 7 H), 1.36–1.46 (m, 1 H), 1.65–1.74 (m, 1 H), 1.75–1.85 (m, 1 H), 1.84 (d, *J* = 3.2 Hz, 1 H), 4.66 (td, *J* = 6.7, 3.2 Hz, 1 H), 7.24–7.30 (m, 1 H), 7.32–7.37 (m, 4 H).

**Iron–copper-catalyzed isomerization of alkyl Grignard reagents followed by reaction with CO<sub>2</sub> (Schemes 1 and 2): A general procedure.** A solution of FeCl<sub>3</sub> (2.4 mg, 15 μmol), CuBr (4.3 mg, 30 μmol) and PBu<sub>3</sub> (15 μL, 12 mg, 60 μmol) in THF (2.0 mL) was placed in a 20 mL Schlenk tube and stirred for 5 min at –25 °C. To this solution was added an Et<sub>2</sub>O solution (0.24–0.84 M) of an alkylmagnesium halide (0.30 mmol), and the mixture was stirred at –25 °C for 10 min. After CO<sub>2</sub> gas (dried by passing through conc. H<sub>2</sub>SO<sub>4</sub>) was bubbled for 1 h at –10 °C, a 1 M HCl aqueous solution (3 mL) was added, and the resulting mixture was extracted with ethyl acetate (5 mL x 3). After evaporation of the solvent, the residue was diluted with diethyl ether (5 mL), and acidic compounds were extracted with a 1 M NaOH aqueous solution (5 mL x 2). The combined aqueous layer was acidified with a 1 M HCl aqueous solution (15 mL) and extracted with ethyl acetate (20 mL x 2). The combined organic layer was dried over anhydrous magnesium sulfate. Evaporation of the solvent gave the corresponding linear carboxylic acid. <sup>1</sup>H NMR showed that no branch isomers were included.

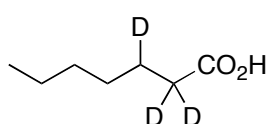

**2,2,3-Trideuterioheptanoic acid (6a-d<sub>3</sub>).** A colorless oil. <sup>1</sup>H NMR (400 MHz, CDCl<sub>3</sub>) δ 0.89 (t, *J* = 6.8 Hz, 3 H), 1.21–1.40 (m, 6 H), 1.55–1.70 (m, 1.02 H), 2.28–2.42 (m, 0.27 H). <sup>1</sup>H NMR is consistent with the corresponding non-deuterated carboxylic acid (**6a**). HRMS shows that it contains a mixture of di-, tri- and tetradeuterated heptanoic acids. HRMS (ESI) Calcd for C<sub>7</sub>H<sub>11</sub>D<sub>3</sub>O<sub>2</sub>: [M–H]<sup>–</sup>, 131.104657. Found: *m/z* 131.104694; Calcd for C<sub>7</sub>H<sub>10</sub>D<sub>3</sub>O<sub>2</sub>: [M–H]<sup>–</sup>, 132.110933. Found: *m/z* 132.111408; Calcd for C<sub>7</sub>H<sub>9</sub>D<sub>4</sub>O<sub>2</sub>: [M–H]<sup>–</sup>, 133.117210. Found: *m/z* 133.116608.

Carboxylic acids **6a**, **6b** and **6c** have already been reported in the literature. Their <sup>1</sup>H NMR data are as follows.

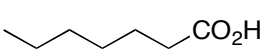 **Heptanoic acid (6a).** A colorless oil. <sup>1</sup>H NMR (500 MHz, CDCl<sub>3</sub>) δ 0.89 (t, *J* = 6.9 Hz, 3 H), 1.22–1.40 (m, 6 H), 1.64 (quint, *J* = 7.5 Hz, 2 H), 2.35 (t, *J* = 7.5 Hz, 2 H).

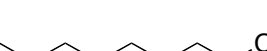 **Nonanoic acid (6b).** A colorless oil. <sup>1</sup>H NMR (400 MHz, CDCl<sub>3</sub>) δ 0.88 (t, *J* = 6.8 Hz, 3 H), 1.18–1.41 (m, 10 H), 1.63 (quint, *J* = 7.6 Hz, 2 H), 2.35 (t, *J* = 7.6 Hz, 2 H).

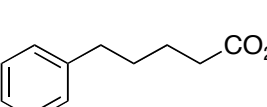 **5-Phenylpentanoic acid (6c).** A white crystal. <sup>1</sup>H NMR (500 MHz, CDCl<sub>3</sub>) δ 1.64–1.73 (m, 4 H), 2.38 (t, *J* = 7.2 Hz, 2 H), 2.64 (t, *J* = 7.1 Hz, 2 H), 7.18 (d, *J* = 8.1 Hz, 2 H), 7.15–7.21 (m, 1 H), 7.27 (t, *J* = 8.0 Hz, 2 H).

**Isomerization of 2-octylmagnesium chloride in the presence of a stoichiometric amount of FeCl<sub>3</sub> or CuBr (Scheme 3).** To a solution of FeCl<sub>3</sub> (10 mg, 0.062 mmol) or CuBr (8.9 mg, 0.062 mmol) in addition to PBu<sub>3</sub> (50 mg, 0.25 mmol for FeCl<sub>3</sub>; 25 mg, 0.13 mmol for CuBr) in THF (2.0 mL) was placed in a 20 mL Schlenk tube and stirred for 5 min at –25 °C. To this solution was added an Et<sub>2</sub>O solution (0.65 M) of 2-octylmagnesium chloride (**1b**: 0.57 mL, 0.37 mmol), and the mixture was stirred for 10 min at –25 °C. After D<sub>2</sub>O (0.70 mL), Cl<sub>2</sub>CDCDCl<sub>2</sub> (internal standard for <sup>2</sup>H NMR analysis) and Et<sub>2</sub>O (1.0 mL)

were added, an aliquot (0.2 mL) of the organic layer was diluted with CHCl<sub>3</sub> (0.5 mL) and subjected to <sup>2</sup>H NMR analysis. The yield of 1-deuteriooctane (**7**) was determined using Cl<sub>2</sub>CDCDCl<sub>2</sub> as an internal standard.

**Iron–copper-catalyzed reaction of 3-hexylmagnesium bromide in the absence or presence of 1-decene (Scheme 5).** A solution of FeCl<sub>3</sub> (2.4 mg, 0.015 mmol), CuBr (4.3 mg, 0.030 mmol) and PBu<sub>3</sub> (15 μL, 12 mg, 0.060 mmol) with or without 1-decene (42 mg, 0.30 mmol) in THF (2.0 mL) was placed in a 20 mL Schlenk tube and stirred for 5 min at –25 °C. To this solution was added an Et<sub>2</sub>O solution (0.45 M) of 3-hexylmagnesium bromide (**14**: 0.67 mL, 0.30 mmol), and the mixture was stirred at –25 °C. After 10 min, chloro(phenyl)silane (80 μL, 0.60 mmol) was added and stirred for 2 h at 30 °C. To this solution were added water (1 mL) and nonane (internal standard for GC analysis), and the resulting mixture was diluted with diethyl ether (2 mL). An aliquot of the organic layer was subjected to GC analysis. The yields and the isomer ratios were determined by GC using nonane as an internal standard.

### References

- 1 P.-F. Fu, L. Brard, Y. Li and T. J. Marks, *J. Am. Chem. Soc.*, 1995, **117**, 7157–7168.
- 2 G. A. Molander and M. Julius, *J. Org. Chem.*, 1992, **57**, 6347–6351.
- 3 E. Alonso, J. D. Ramón and M. Yus, *Tetrahedron*, 1996, **52**, 14341–14348.
